# Supplementary material
Source: PubMed Central journal article supplement (PMC1698897)
Supplement: 7601451s1.pdf [file 7601451s1.pdf]

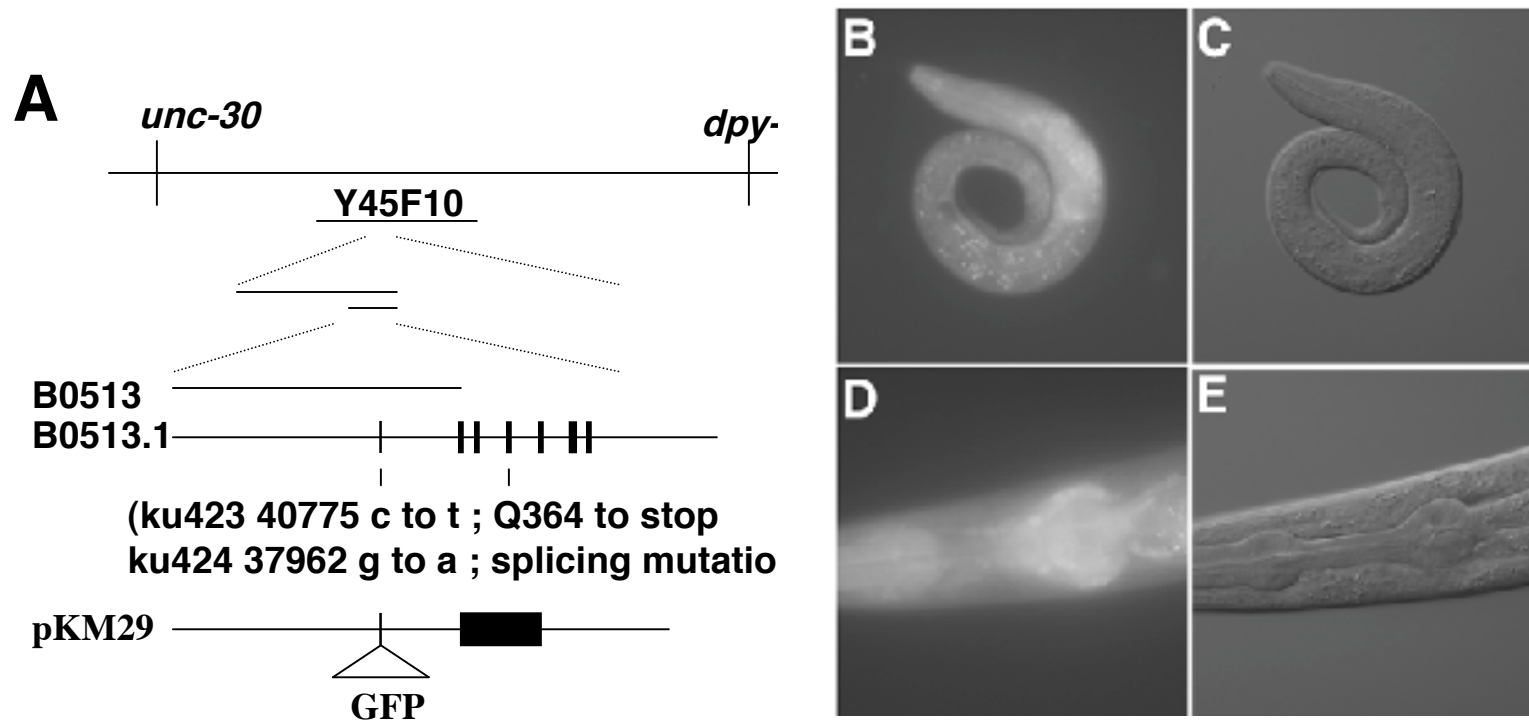

**Figure S1. Molecular cloning of *lin-66* and the expression analysis of a functional *lin-66::GFP* fusion gene**

(A) The genomic region between *unc-30* and *dpy-4* on chromosome IV is shown. Injections of YAC clone Y45 F10, cosmid B0513 and subclone pKM29 were able to rescue the *ku423* phenotypes. (B-E) Fluorescent images (B and D) and DIC images (C and E) of an L1 (B and C) and an adult (D and E) transgenic animal containing a *lin-66::GFP* translational fusion construct.
