# Supplementary material
Source: PubMed Central journal article supplement (PMC1698897)
Supplement: 7601451s2.pdf [file 7601451s2.pdf]

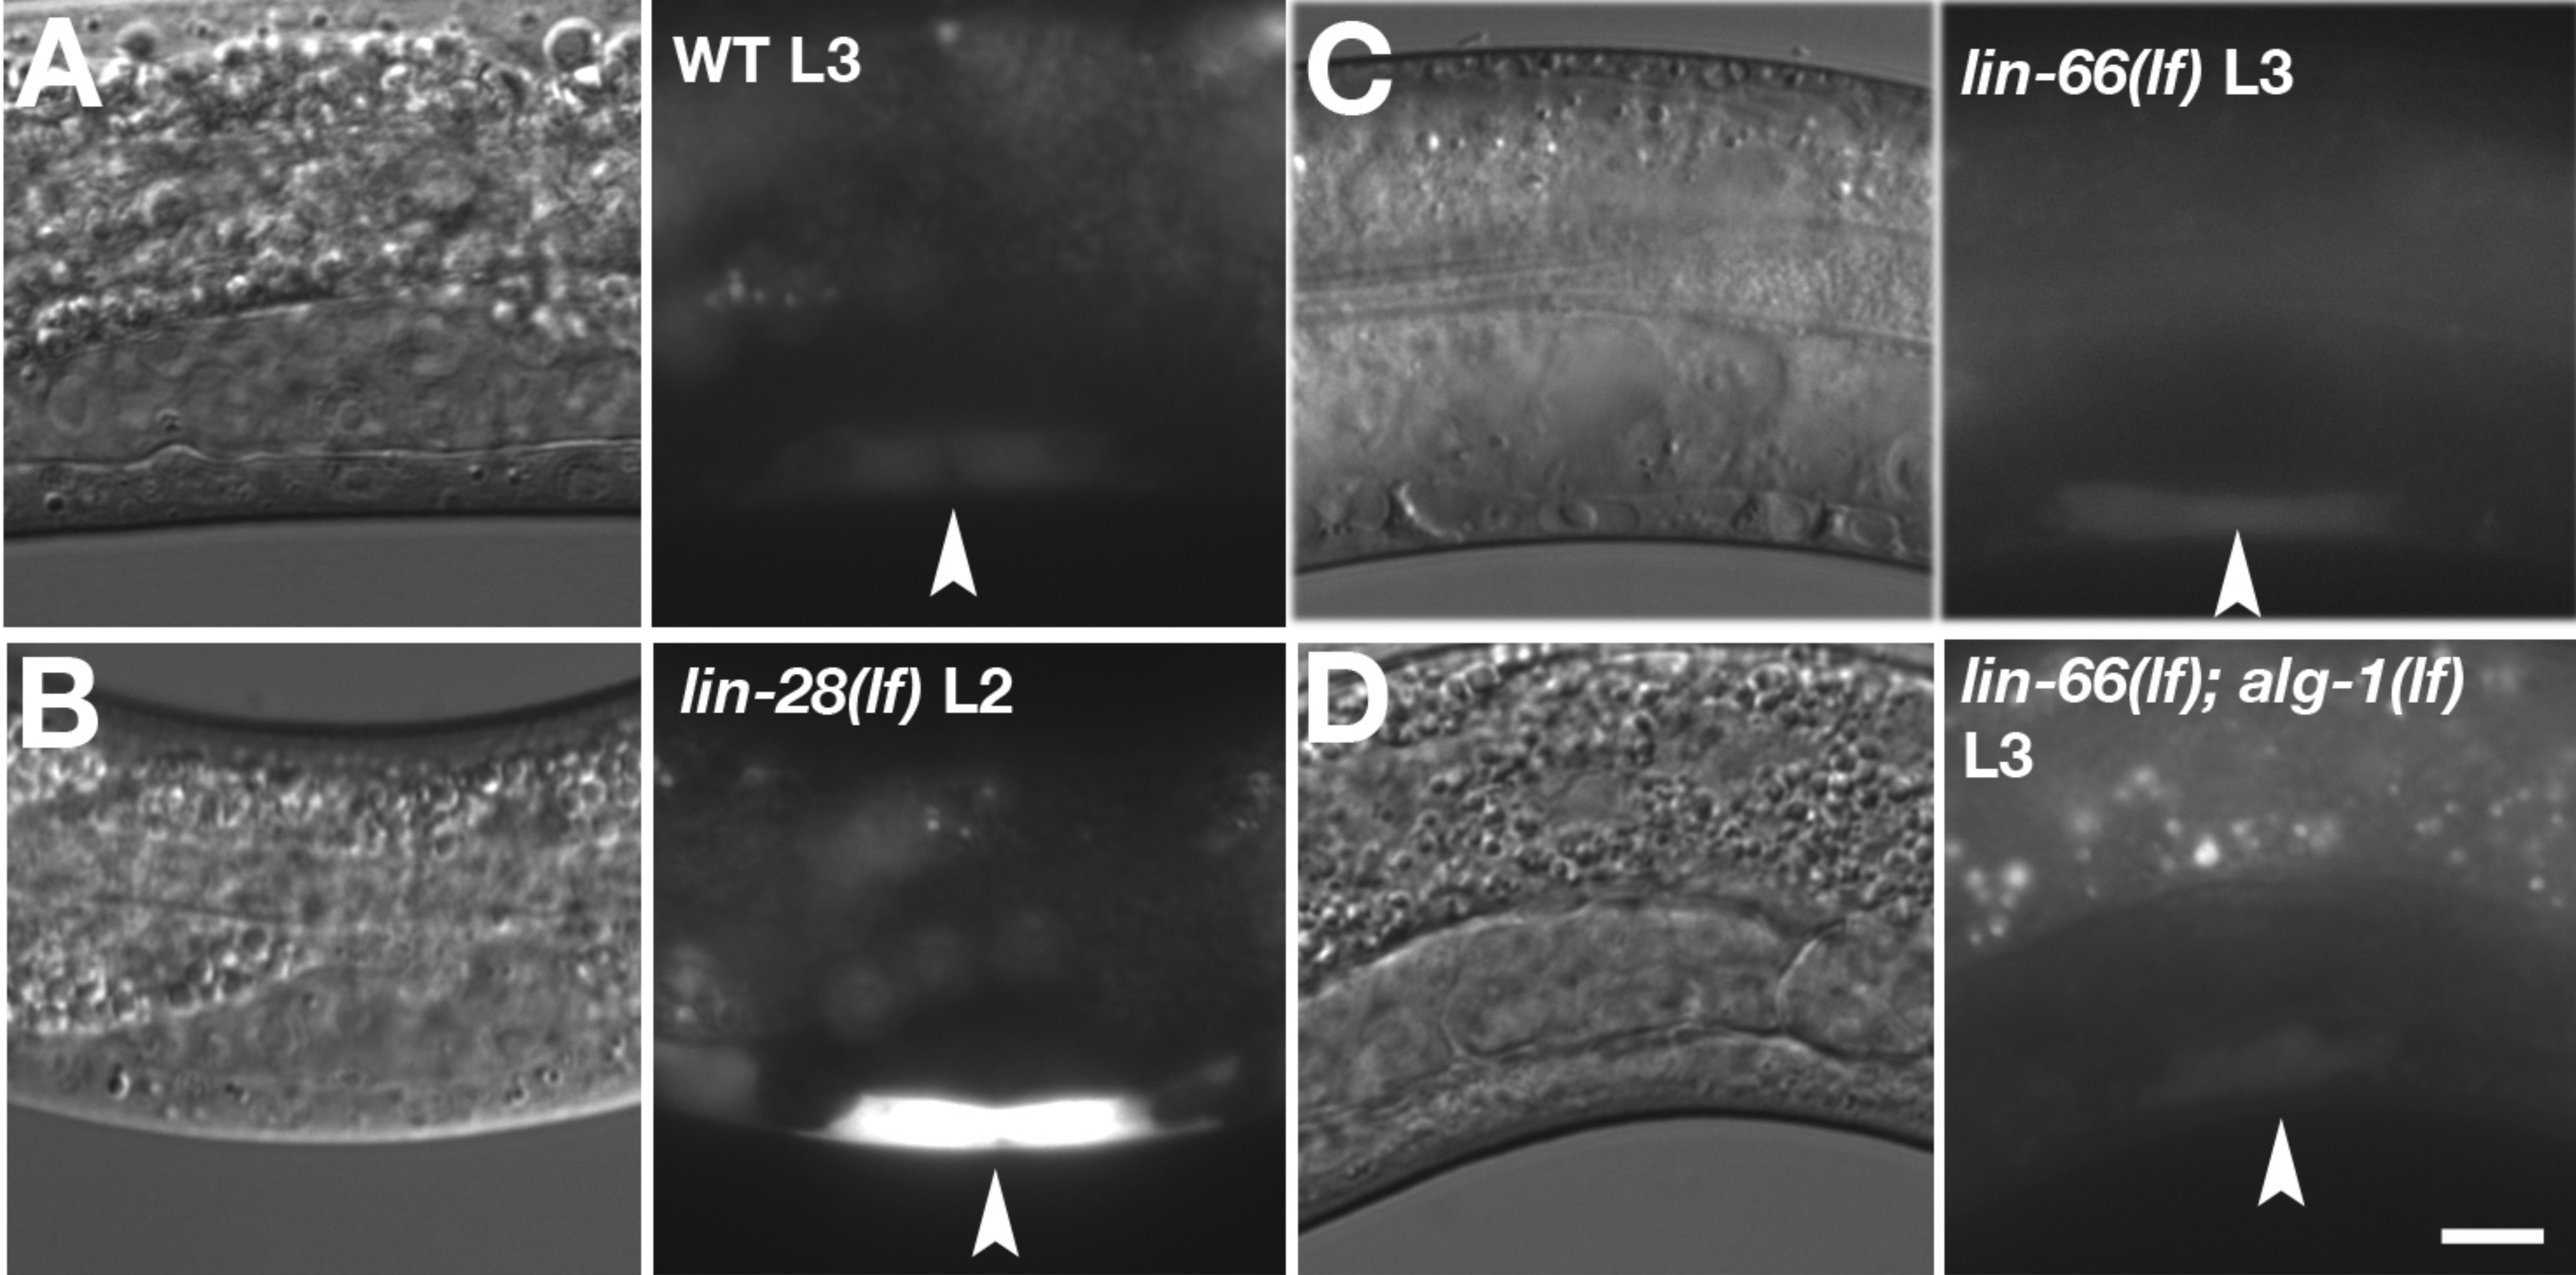

**Figure S2. *egl-17::GFP* expression in heterochronic gene mutants**  
**DIC (left) and fluorescent (right) images of WT and mutant animals at L2 or L3 stages as indicated. Arrows indicate the *egl-17::GFP* expression in the P6.p cell.**
