# Supplementary material
Source: PubMed Central journal article supplement (PMC1698897)
Supplement: 7601451s3.pdf [file 7601451s3.pdf]

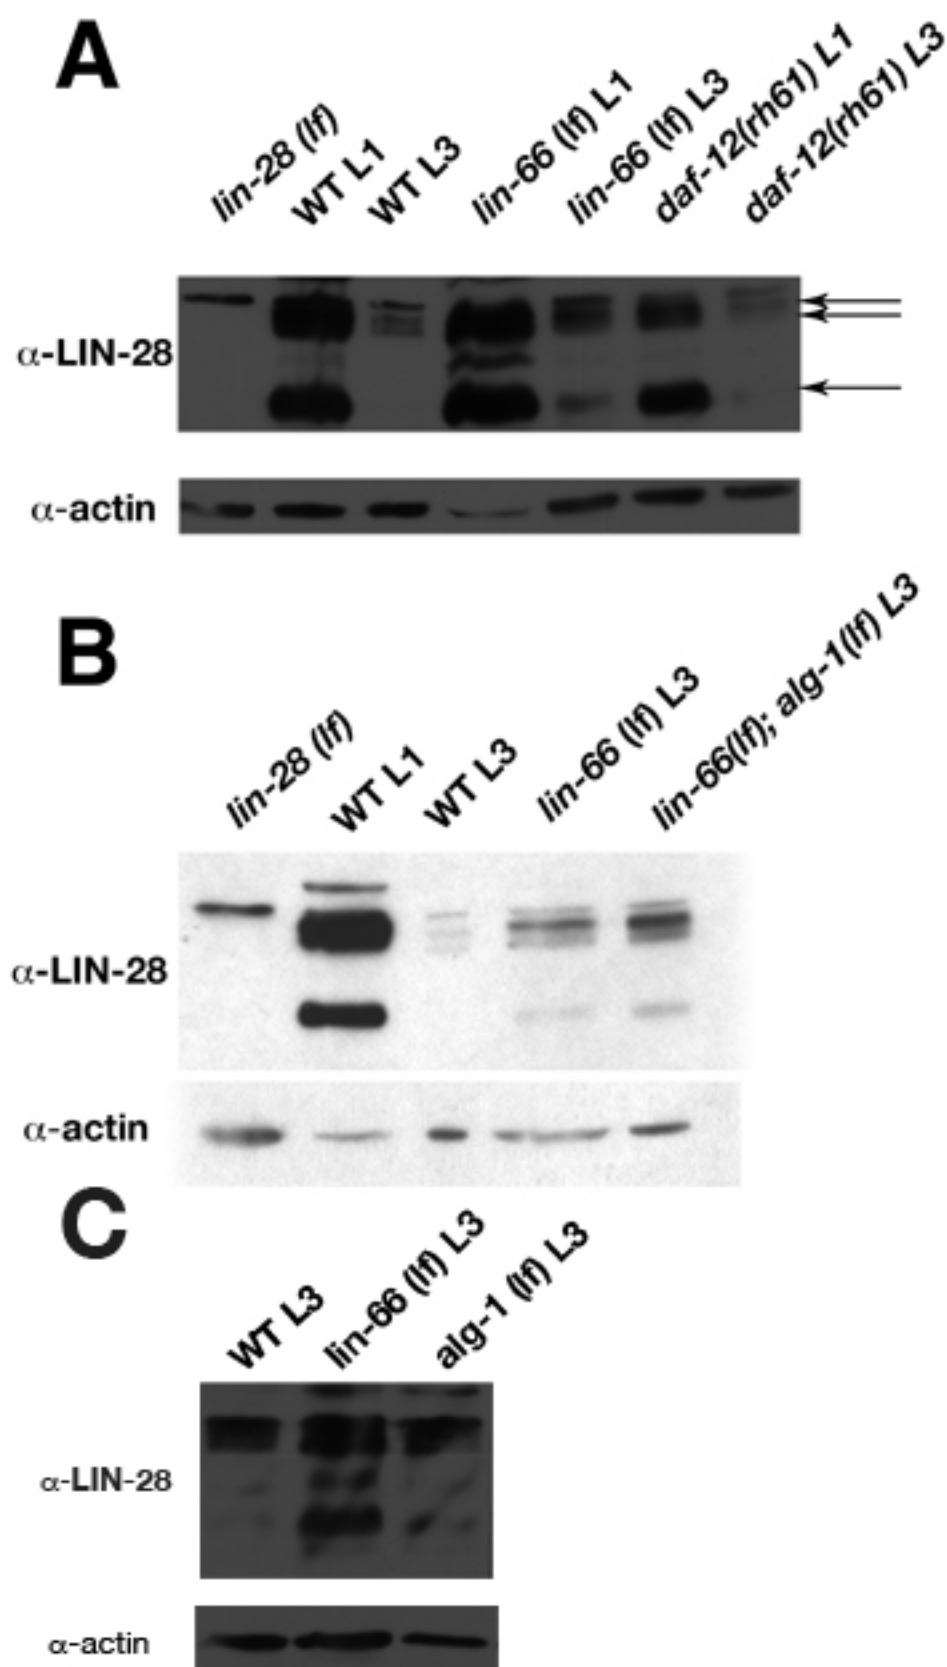

Figure S3. Western blot analysis of endogenous LIN-28 protein using an anti-LIN-28 antibody. (A) A lighter exposure of the gel shown in Figure 4G. Arrows indicate three LIN-28 protein bands determined in a previous study (Seggerson et al., 2002). Estimated fold change from L1 to L3 : WT, 18 fold decrease; *lin-66* 4 fold decrease; and *daf-12* 6 fold decrease. (B, C) Western blots from independent experiments.
