# Supplementary material
Source: PubMed Central journal article supplement (PMC1698897)
Supplement: 7601451s4.pdf [file 7601451s4.pdf]

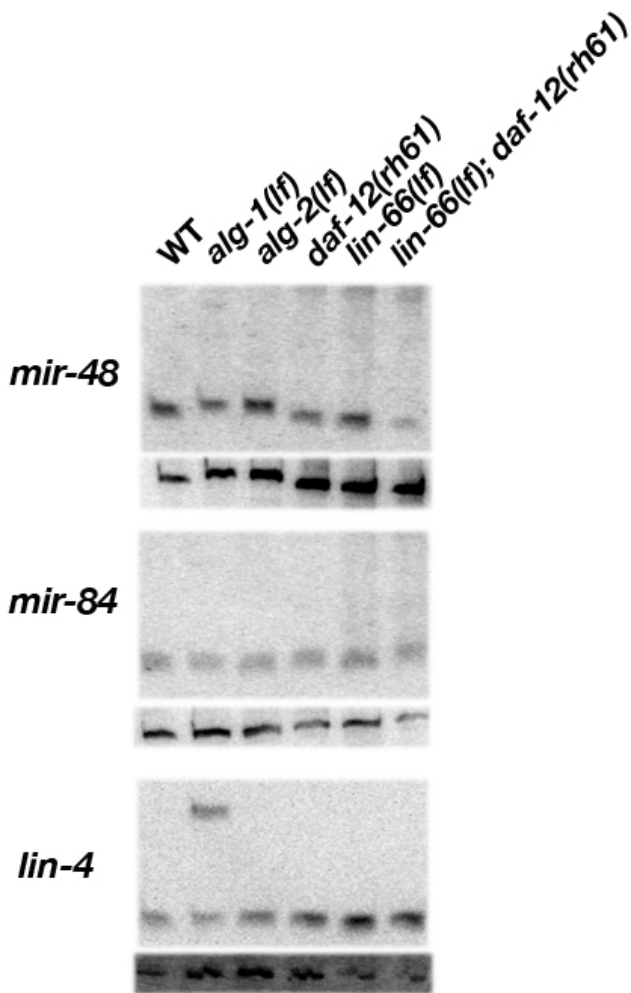

Figure S4. Northern blot analysis of miRNA expression in heterochronic mutants. Lower panel is the loading control (U6).
